# Supplementary material for: In situ grown Ru-doped Ni(OH)2 nanosheets on nickel foam for stable electrocatalytic hydrogen evolution reaction
Source: Royal Society of Chemistry journal article supplement (doi:10.1039/d4cy01074d), 2024-12-03
Supplement: d4cy01074d1.pdf [file d4cy01074d1.pdf]

## Supporting Information

### **In-situ grown Ru-doped Ni(OH)<sub>2</sub> nanosheets on nickel foam for stable electrocatalytic hydrogen evolution reaction**

Ting Zhou<sup>a</sup>, Shanshan Ye<sup>a</sup>, Jing Gao<sup>a</sup>, Hang Zhang<sup>a\*</sup>, Shengliang Zhong<sup>a</sup>

<sup>a</sup> Jiangxi Province Key Lab of Porous Functional Materials, College of Chemistry and Materials, Jiangxi Normal University, Nanchang, 330022, P.R. China

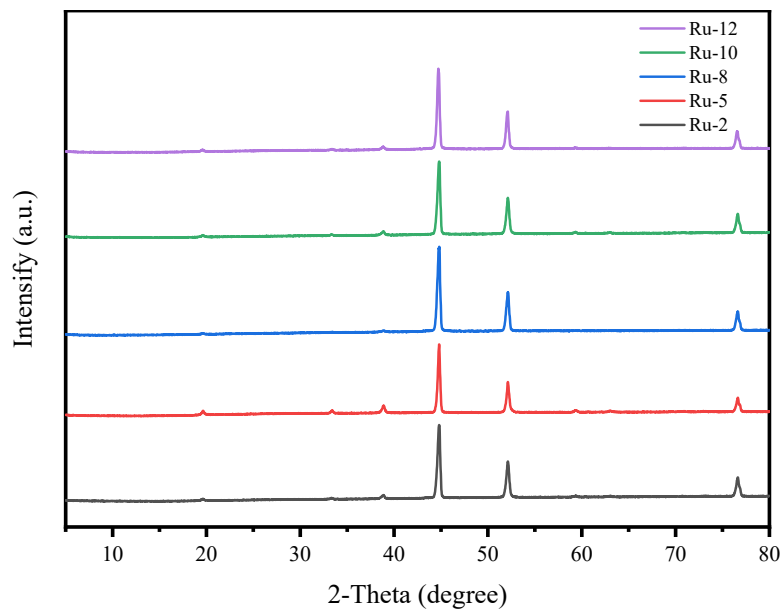

**Fig. S1.** XRD patterns of  $\text{Ni}(\text{OH})_2\text{-NF}$  with different Ru doping levels.

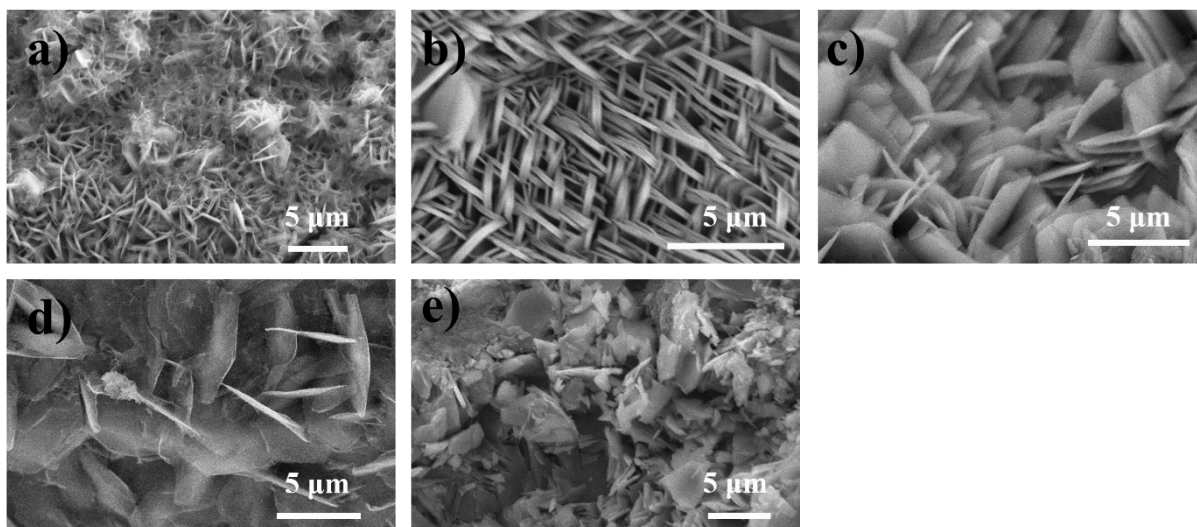

**Fig. S2.** SEM images of  $\text{Ru}/\text{Ni}(\text{OH})_2\text{-NF}$  with different Ru doping levels: (a) 2 mg, (b) 5 mg, (c) 8 mg, (d) 10 mg and (e) 12 mg.

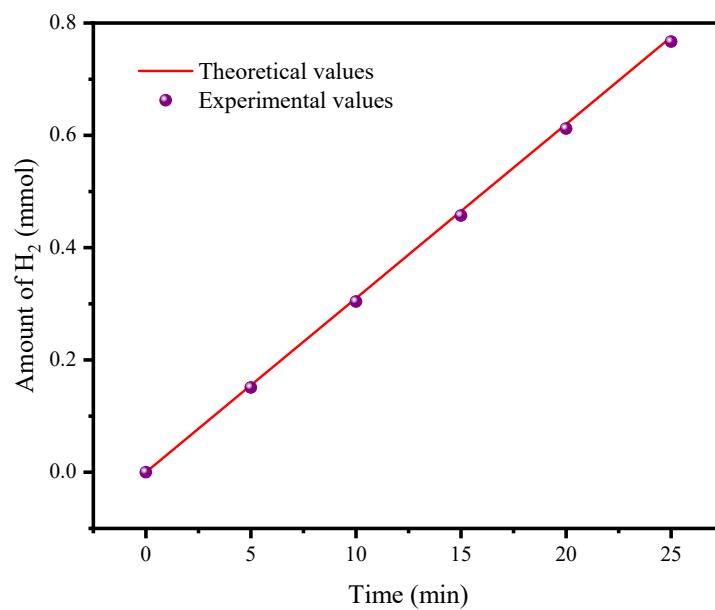

**Fig. S3.** Comparison of the evolved hydrogen volume with the theoretical hydrogen volume calculated based on the amount of consumed charges over the course of electrolysis.

**Table S1.** ICP-OES results for the Ru/Ni(OH)<sub>2</sub>-NF catalysts.

| Elements | Elements contents |
|----------|-------------------|
|          | (wt%)             |
| Ru       | 0.34              |
| Ni       | 98.30             |
